# Supplementary material for: Patterns of Blood Transfusion in Sickle Cell Disease Hospitalizations
Source: MDPI journal article supplement (doi:10.3390/hemato5010004), 2024-01-15
Supplement: s1 [file s1]

Table S1: Diagnoses and Procedure codes used in the study

Diagnosis codes {International Classification of Diseases, Tenth Revision Clinical Modification (ICD-10-CM)}:

Sickle cell disease: D5700 D5701 D5702 D57211 D57212 D57219 D57411 D57412 D57419 D57811 D57812 D57819 D571 D5720 D5740 D5780

Acute kidney injury: N170 N171 N172 N178 N179

Fluid electrolyte imbalance: E860 E861 E869 E870 E871 E872 E873 E874 E875 E876 E8770 E8779 E878

Arrhythmia and heart block: I440 I441 I442 I4430 I4439 I444 I445 I4460 I4469  
I447 I450 I4510 I4519 I452 I453 I454 I455 I456 I4581 I4589 I459  
I470 I471 I472 I479 I480 I481 I482 I483 I484 I4891 I4892 I491  
I492 I493 I4940 I4949 I495 I498 I499 I462 I468 I469 I4901 I4902  
R000 R001

Infection or sepsis:

A000 A001 A009 A0100 A0101 A0102 A0103 A0104 A0105 A0109 A011 A012 A013  
A014 A020 A021 A0220 A0221 A0222 A0223 A0224 A0225 A0229 A028 A029  
A030 A031 A032 A033 A038 A039 A040 A041 A042 A043 A044 A045  
A046 A047 A0471 A0472 A048 A049 A050 A051 A052 A053 A054 A055  
A058 A059 A060 A061 A062 A063 A064 A065 A066 A067 A0681 A0682  
A0689 A069 A070 A071 A072 A073 A074 A078 A079 A080 A0811 A0819  
A082 A0831 A0832 A0839 A084 A088 A09 A150 A154 A155 A156 A157  
A158 A159 A170 A171 A1781 A1782 A1783 A1789 A179 A1801 A1802 A1803  
A1809 A1810 A1811 A1812 A1813 A1814 A1815 A1816 A1817 A1818 A182 A1831  
A1832 A1839 A184 A1850 A1851 A1852 A1853 A1854 A1859 A186 A187 A1881  
A1882 A1883 A1884 A1885 A1889 A190 A191 A192 A198 A199 A200 A201  
A202 A203 A207 A208 A209 A210 A211 A212 A213 A217 A218 A219  
A220 A221 A222 A227 A228 A229 A230 A231 A232 A233 A238 A239  
A240 A241 A242 A243 A249 A250 A251 A259 A260 A267 A268 A269  
A270 A2781 A2789 A279 A280 A281 A282 A288 A289 A300 A301 A302  
A303 A304 A305 A308 A309 A310 A311 A312 A318 A319 A320 A3211  
A3212 A327 A3281 A3282 A3289 A329 A33 A34 A35 A360 A361 A362  
A363 A3681 A3682 A3683 A3684 A3685 A3686 A3689 A369 A3700 A3701 A3710  
A3711 A3780 A3781 A3790 A3791 A380 A381 A388 A389 A390 A391 A392  
A393 A394 A3950 A3951 A3952 A3953 A3981 A3982 A3983 A3984 A3989 A399  
A400 A401 A403 A408 A409 A4101 A4102 A411 A412 A413 A414 A4150  
A4151 A4152 A4153 A4159 A4181 A4189 A419 A420 A421 A422 A427 A4281  
A4282 A4289 A429 A430 A431 A438 A439 A440 A441 A448 A449 A46  
A480 A481 A482 A483 A484 A4851 A4852 A488 A4901 A4902 A491 A492  
A493 A498 A499 A5001 A5002 A5003 A5004 A5005 A5006 A5007 A5008 A5009  
A501 A502 A5030 A5031 A5032 A5039 A5040 A5041 A5042 A5043 A5044 A5045  
A5049 A5051 A5052 A5053 A5054 A5055 A5056 A5057 A5059 A506 A507 A509

|       |       |       |       |       |       |       |        |        |       |       |       |
|-------|-------|-------|-------|-------|-------|-------|--------|--------|-------|-------|-------|
| A510  | A511  | A512  | A5131 | A5132 | A5139 | A5141 | A5142  | A5143  | A5144 | A5145 | A5146 |
| A5149 | A515  | A519  | A5200 | A5201 | A5202 | A5203 | A5204  | A5205  | A5206 | A5209 | A5210 |
| A5211 | A5212 | A5213 | A5214 | A5215 | A5216 | A5217 | A5219  | A522   | A523  | A5271 | A5272 |
| A5273 | A5274 | A5275 | A5276 | A5277 | A5278 | A5279 | A528   | A529   | A530  | A539  | A5400 |
| A5401 | A5402 | A5403 | A5409 | A541  | A5421 | A5422 | A5423  | A5424  | A5429 | A5430 | A5431 |
| A5432 | A5433 | A5439 | A5440 | A5441 | A5442 | A5443 | A5449  | A545   | A546  | A5481 | A5482 |
| A5483 | A5484 | A5485 | A5486 | A5489 | A549  | A55   | A5600  | A5601  | A5602 | A5609 | A5611 |
| A5619 | A562  | A563  | A564  | A568  | A57   | A58   | A5900  | A5901  | A5902 | A5903 | A5909 |
| A598  | A599  | A6000 | A6001 | A6002 | A6003 | A6004 | A6009  | A601   | A609  | A630  | A638  |
| A64   | A65   | A660  | A661  | A662  | A663  | A664  | A665   | A666   | A667  | A668  | A669  |
| A670  | A671  | A672  | A673  | A679  | A680  | A681  | A689   | A690   | A691  | A6920 | A6921 |
| A6922 | A6923 | A6929 | A698  | A699  | A70   | A710  | A711   | A719   | A740  | A7481 | A7489 |
| A749  | A750  | A751  | A752  | A753  | A759  | A770  | A771   | A772   | A773  | A7740 | A7741 |
| A7749 | A778  | A779  | A78   | A790  | A791  | A7981 | A7989  | A799   | A800  | A801  | A802  |
| A8030 | A8039 | A804  | A809  | A8100 | A8101 | A8109 | A811   | A812   | A8181 | A8182 | A8183 |
| A8189 | A819  | A820  | A821  | A829  | A830  | A831  | A832   | A833   | A834  | A835  | A836  |
| A838  | A839  | A840  | A841  | A848  | A8481 | A8489 | A849   | A850   | A851  | A852  | A858  |
| A86   | A870  | A871  | A872  | A878  | A879  | A880  | A881   | A888   | A89   | A90   | A91   |
| A920  | A921  | A922  | A9230 | A9231 | A9232 | A9239 | A924   | A925   | A928  | A929  | A930  |
| A931  | A932  | A938  | A94   | A950  | A951  | A959  | A960   | A961   | A962  | A968  | A969  |
| A980  | A981  | A982  | A983  | A984  | A985  | A988  | A99    | B000   | B001  | B002  | B003  |
| B004  | B0050 | B0051 | B0052 | B0053 | B0059 | B007  | B0081  | B0082  | B0089 | B009  | B010  |
| B0111 | B0112 | B012  | B0181 | B0189 | B019  | B020  | B021   | B0221  | B0222 | B0223 | B0224 |
| B0229 | B0230 | B0231 | B0232 | B0233 | B0234 | B0239 | B027   | B028   | B029  | B03   | B04   |
| B050  | B051  | B052  | B053  | B054  | B0581 | B0589 | B059   | B0600  | B0601 | B0602 | B0609 |
| B0681 | B0682 | B0689 | B069  | B070  | B078  | B079  | B08010 | B08011 | B0802 | B0803 | B0804 |
| B0809 | B081  | B0820 | B0821 | B0822 | B083  | B084  | B085   | B0860  | B0861 | B0862 | B0869 |
| B0870 | B0871 | B0872 | B0879 | B088  | B09   | B1001 | B1009  | B1081  | B1082 | B1089 | B150  |
| B159  | B160  | B161  | B162  | B169  | B170  | B1710 | B1711  | B172   | B178  | B179  | B180  |
| B181  | B182  | B188  | B189  | B190  | B1910 | B1911 | B1920  | B1921  | B199  | B20   | B250  |
| B251  | B252  | B258  | B259  | B260  | B261  | B262  | B263   | B2681  | B2682 | B2683 | B2684 |
| B2685 | B2689 | B269  | B2700 | B2701 | B2702 | B2709 | B2710  | B2711  | B2712 | B2719 | B2780 |
| B2781 | B2782 | B2789 | B2790 | B2791 | B2792 | B2799 | B300   | B301   | B302  | B303  | B308  |
| B309  | B330  | B331  | B3320 | B3321 | B3322 | B3323 | B3324  | B333   | B334  | B338  | B340  |
| B341  | B342  | B343  | B344  | B348  | B349  | B350  | B351   | B352   | B353  | B354  | B355  |
| B356  | B358  | B359  | B360  | B361  | B362  | B363  | B368   | B369   | B370  | B371  | B372  |
| B373  | B3741 | B3742 | B3749 | B375  | B376  | B377  | B3781  | B3782  | B3783 | B3784 | B3789 |
| B379  | B380  | B381  | B382  | B383  | B384  | B387  | B3881  | B3889  | B389  | B390  | B391  |
| B392  | B393  | B394  | B395  | B399  | B400  | B401  | B402   | B403   | B407  | B4081 | B4089 |
| B409  | B410  | B417  | B418  | B419  | B420  | B421  | B427   | B4281  | B4282 | B4289 | B429  |
| B430  | B431  | B432  | B438  | B439  | B440  | B441  | B442   | B447   | B4481 | B4489 | B449  |
| B450  | B451  | B452  | B453  | B457  | B458  | B459  | B460   | B461   | B462  | B463  | B464  |
| B465  | B468  | B469  | B470  | B471  | B479  | B480  | B481   | B482   | B483  | B484  | B488  |
| B49   | B500  | B508  | B509  | B510  | B518  | B519  | B520   | B528   | B529  | B530  | B531  |

|        |        |        |        |        |        |        |        |        |        |        |        |
|--------|--------|--------|--------|--------|--------|--------|--------|--------|--------|--------|--------|
| B538   | B54    | B550   | B551   | B552   | B559   | B560   | B561   | B569   | B570   | B571   | B572   |
| B5730  | B5731  | B5732  | B5739  | B5740  | B5741  | B5742  | B5749  | B575   | B5800  | B5801  | B5809  |
| B581   | B582   | B583   | B5881  | B5882  | B5883  | B5889  | B589   | B59    | B600   | B6000  | B6001  |
| B6002  | B6003  | B6009  | B6010  | B6011  | B6012  | B6013  | B6019  | B602   | B608   | B64    | B650   |
| B651   | B652   | B653   | B658   | B659   | B660   | B661   | B662   | B663   | B664   | B665   | B668   |
| B669   | B670   | B671   | B672   | B6731  | B6732  | B6739  | B674   | B675   | B6761  | B6769  | B677   |
| B678   | B6790  | B6799  | B680   | B681   | B689   | B690   | B691   | B6981  | B6989  | B699   | B700   |
| B701   | B710   | B711   | B718   | B719   | B72    | B7300  | B7301  | B7302  | B7309  | B731   | B740   |
| B741   | B742   | B743   | B744   | B748   | B749   | B75    | B760   | B761   | B768   | B769   | B770   |
| B7781  | B7789  | B779   | B780   | B781   | B787   | B789   | B79    | B80    | B810   | B811   | B812   |
| B813   | B814   | B818   | B820   | B829   | B830   | B831   | B832   | B833   | B834   | B838   | B839   |
| B850   | B851   | B852   | B853   | B854   | B86    | B870   | B871   | B872   | B873   | B874   | B8781  |
| B8782  | B8789  | B879   | B880   | B881   | B882   | B883   | B888   | B889   | B89    | B900   | B901   |
| B902   | B908   | B909   | B91    | B92    | B940   | B941   | B942   | B948   | B949   | B950   | B951   |
| B952   | B953   | B954   | B955   | B9561  | B9562  | B957   | B958   | B960   | B961   | B9620  | B9621  |
| B9622  | B9623  | B9629  | B963   | B964   | B965   | B966   | B967   | B9681  | B9682  | B9689  | B970   |
| B9710  | B9711  | B9712  | B9719  | B9721  | B9729  | B9730  | B9731  | B9732  | B9733  | B9734  | B9735  |
| B9739  | B974   | B975   | B976   | B977   | B9781  | B9789  | B998   | B999   | R6521  | R7881  | I76    |
| R6520  | I00    | I029   | K9081  | G000   | G001   | G002   | G003   | G008   | G009   | G01    | G02    |
| G042   | I301   | I330   | I400   | J1082  | J120   | J121   | J122   | J123   | J1281  | J1289  | J129   |
| J13    | J14    | J150   | J151   | J1520  | J15211 | J15212 | J1529  | J153   | J154   | J155   | J156   |
| J157   | J158   | J159   | J160   | J168   | J17    | J180   | J181   | J188   | J189   | J851   | J852   |
| J09X1  | J09X2  | J09X3  | J09X9  | J1000  | J1001  | J1008  | J101   | J102   | J1089  | J1100  | J1108  |
| J111   | J112   | J1181  | J1182  | J1183  | J1189  | J36    | J200   | J201   | J202   | J203   | J204   |
| J205   | J206   | J207   | J208   | J210   | J211   | J218   | J219   | A360   | A361   | A362   | J00    |
| J020   | J028   | J0300  | J0301  | J069   | J440   | J470   | J340   | J390   | J391   | K610   | K611   |
| K612   | K613   | K614   | K630   | K650   | K651   | K652   | N10    | N151   | N3000  | N3001  | N340   |
| N764   | L0100  | L0101  | L0102  | L0103  | L0109  | L011   | L0201  | L0202  | L0203  | L0211  | L0212  |
| L0213  | L02211 | L02212 | L02213 | L02214 | L02215 | L02216 | L02219 | L02221 | L02222 | L02223 | L02224 |
| L02225 | L02226 | L02229 | L02231 | L02232 | L02233 | L02234 | L02235 | L02236 | L02239 | L0231  | L0232  |
| L0233  | L02411 | L02412 | L02413 | L02414 | L02415 | L02416 | L02419 | L02421 | L02422 | L02423 | L02424 |
| L02425 | L02426 | L02429 | L02431 | L02432 | L02433 | L02434 | L02435 | L02436 | L02439 | L02511 | L02512 |
| L02519 | L02521 | L02522 | L02529 | L02531 | L02532 | L02539 | L02611 | L02612 | L02619 | L02621 | L02622 |
| L02629 | L02631 | L02632 | L02639 | L02811 | L02818 | L02821 | L02828 | L02831 | L02838 | L0291  | L0292  |
| L0293  | L03011 | L03012 | L03019 | L03021 | L03022 | L03029 | L03031 | L03032 | L03039 | L03041 | L03042 |
| L03049 | L03111 | L03112 | L03113 | L03114 | L03115 | L03116 | L03119 | L03121 | L03122 | L03123 | L03124 |
| L03125 | L03126 | L03129 | L03211 | L03212 | L03213 | L03221 | L03222 | L03311 | L03312 | L03313 | L03314 |
| L03315 | L03316 | L03317 | L03319 | L03321 | L03322 | L03323 | L03324 | L03325 | L03326 | L03327 | L03329 |
| L03811 | L03818 | L03891 | L03898 | L0390  | L0391  | L0889  | L089   | M0000  | M00011 |        |        |
| M00012 |        | M00019 |        | M00021 |        | M00022 |        | M00029 |        | M00031 |        |
| M00032 |        | M00039 |        | M00041 |        | M00042 |        | M00049 |        | M00051 |        |
| M00052 |        | M00059 |        | M00061 |        | M00062 |        | M00069 |        | M00071 |        |
| M00072 |        | M00079 |        | M0008  | M0009  | M0010  | M00111 |        | M00112 |        |        |
| M00119 |        | M00121 |        | M00122 |        | M00129 |        | M00131 |        | M00132 |        |

|             |              |              |             |             |             |
|-------------|--------------|--------------|-------------|-------------|-------------|
| M00139      | M00141       | M00142       | M00149      | M00151      | M00152      |
| M00159      | M00161       | M00162       | M00169      | M00171      | M00172      |
| M00179      | M0018 M0019  | M0020 M00211 | M00212      | M00219      |             |
| M00221      | M00222       | M00229       | M00231      | M00232      | M00239      |
| M00241      | M00242       | M00249       | M00251      | M00252      | M00259      |
| M00261      | M00262       | M00269       | M00271      | M00272      | M00279      |
| M0028 M0029 | M0080 M00811 | M00812       | M00819      | M00821      |             |
| M00822      | M00829       | M00831       | M00832      | M00839      | M00841      |
| M00842      | M00849       | M00851       | M00852      | M00859      | M00861      |
| M00862      | M00869       | M00871       | M00872      | M00879      | M0088 M0089 |
| M009 M01X0  | M01X11       | M01X12       | M01X19      | M01X21      | M01X22      |
| M01X29      | M01X31       | M01X32       | M01X39      | M01X41      | M01X42      |
| M01X49      | M01X51       | M01X52       | M01X59      | M01X61      | M01X62      |
| M01X69      | M01X71       | M01X72       | M01X79      | M01X8 M01X9 | M4620 M4621 |
| M4622 M4623 | M4624 M4625  | M4626 M4627  | M4628 M8600 | M86011      | M86012      |
| M86019      | M86021       | M86022       | M86029      | M86031      | M86032      |
| M86039      | M86041       | M86042       | M86049      | M86051      | M86052      |
| M86059      | M86061       | M86062       | M86069      | M86071      | M86072      |
| M86079      | M8608 M8609  | M8610 M86111 | M86112      | M86119      |             |
| M86121      | M86122       | M86129       | M86131      | M86132      | M86139      |
| M86141      | M86142       | M86149       | M86151      | M86152      | M86159      |
| M86161      | M86162       | M86169       | M86171      | M86172      | M86179      |
| M8618 M8619 | T80211A      | T80211D      | T80211S     | T80212A     | T80212D     |
| T80212S     | T80218A      | T80218D      | T80218S     | T80219A     | T80219D     |
| T80219S     | T8022XA      | T8022XD      | T8022XS     | T8029XA     | T8029XD     |
| T8029XS     | T8140XA      | T8140XD      | T8140XS     | T8144XA     | T8144XD     |
| T8144XS     |              |              |             |             |             |

|      |       |       |       |       |       |       |       |       |       |       |       |       |
|------|-------|-------|-------|-------|-------|-------|-------|-------|-------|-------|-------|-------|
| A000 | A001  | A009  | A0100 | A0101 | A0102 | A0103 | A0104 | A0105 | A0109 | A011  | A012  | A013  |
|      | A014  | A020  | A021  | A0220 | A0221 | A0222 | A0223 | A0224 | A0225 | A0229 | A028  | A029  |
|      | A030  | A031  | A032  | A033  | A038  | A039  | A040  | A041  | A042  | A043  | A044  | A045  |
|      | A046  | A047  | A0471 | A0472 | A048  | A049  | A050  | A051  | A052  | A053  | A054  | A055  |
|      | A058  | A059  | A060  | A061  | A062  | A063  | A064  | A065  | A066  | A067  | A0681 | A0682 |
|      | A0689 | A069  | A070  | A071  | A072  | A073  | A074  | A078  | A079  | A080  | A0811 | A0819 |
|      | A082  | A0831 | A0832 | A0839 | A084  | A088  | A09   | A150  | A154  | A155  | A156  | A157  |
|      | A158  | A159  | A170  | A171  | A1781 | A1782 | A1783 | A1789 | A179  | A1801 | A1802 | A1803 |
|      | A1809 | A1810 | A1811 | A1812 | A1813 | A1814 | A1815 | A1816 | A1817 | A1818 | A182  | A1831 |
|      | A1832 | A1839 | A184  | A1850 | A1851 | A1852 | A1853 | A1854 | A1859 | A186  | A187  | A1881 |
|      | A1882 | A1883 | A1884 | A1885 | A1889 | A190  | A191  | A192  | A198  | A199  | A200  | A201  |
|      | A202  | A203  | A207  | A208  | A209  | A210  | A211  | A212  | A213  | A217  | A218  | A219  |
|      | A220  | A221  | A222  | A227  | A228  | A229  | A230  | A231  | A232  | A233  | A238  | A239  |
|      | A240  | A241  | A242  | A243  | A249  | A250  | A251  | A259  | A260  | A267  | A268  | A269  |
|      | A270  | A2781 | A2789 | A279  | A280  | A281  | A282  | A288  | A289  | A300  | A301  | A302  |

|       |       |       |       |       |       |       |        |        |       |       |       |
|-------|-------|-------|-------|-------|-------|-------|--------|--------|-------|-------|-------|
| A303  | A304  | A305  | A308  | A309  | A310  | A311  | A312   | A318   | A319  | A320  | A3211 |
| A3212 | A327  | A3281 | A3282 | A3289 | A329  | A33   | A34    | A35    | A360  | A361  | A362  |
| A363  | A3681 | A3682 | A3683 | A3684 | A3685 | A3686 | A3689  | A369   | A3700 | A3701 | A3710 |
| A3711 | A3780 | A3781 | A3790 | A3791 | A380  | A381  | A388   | A389   | A390  | A391  | A392  |
| A393  | A394  | A3950 | A3951 | A3952 | A3953 | A3981 | A3982  | A3983  | A3984 | A3989 | A399  |
| A400  | A401  | A403  | A408  | A409  | A4101 | A4102 | A411   | A412   | A413  | A414  | A4150 |
| A4151 | A4152 | A4153 | A4159 | A4181 | A4189 | A419  | A420   | A421   | A422  | A427  | A4281 |
| A4282 | A4289 | A429  | A430  | A431  | A438  | A439  | A440   | A441   | A448  | A449  | A46   |
| A480  | A481  | A482  | A483  | A484  | A4851 | A4852 | A488   | A4901  | A4902 | A491  | A492  |
| A493  | A498  | A499  | A5001 | A5002 | A5003 | A5004 | A5005  | A5006  | A5007 | A5008 | A5009 |
| A501  | A502  | A5030 | A5031 | A5032 | A5039 | A5040 | A5041  | A5042  | A5043 | A5044 | A5045 |
| A5049 | A5051 | A5052 | A5053 | A5054 | A5055 | A5056 | A5057  | A5059  | A506  | A507  | A509  |
| A510  | A511  | A512  | A5131 | A5132 | A5139 | A5141 | A5142  | A5143  | A5144 | A5145 | A5146 |
| A5149 | A515  | A519  | A5200 | A5201 | A5202 | A5203 | A5204  | A5205  | A5206 | A5209 | A5210 |
| A5211 | A5212 | A5213 | A5214 | A5215 | A5216 | A5217 | A5219  | A522   | A523  | A5271 | A5272 |
| A5273 | A5274 | A5275 | A5276 | A5277 | A5278 | A5279 | A528   | A529   | A530  | A539  | A5400 |
| A5401 | A5402 | A5403 | A5409 | A541  | A5421 | A5422 | A5423  | A5424  | A5429 | A5430 | A5431 |
| A5432 | A5433 | A5439 | A5440 | A5441 | A5442 | A5443 | A5449  | A545   | A546  | A5481 | A5482 |
| A5483 | A5484 | A5485 | A5486 | A5489 | A549  | A55   | A5600  | A5601  | A5602 | A5609 | A5611 |
| A5619 | A562  | A563  | A564  | A568  | A57   | A58   | A5900  | A5901  | A5902 | A5903 | A5909 |
| A598  | A599  | A6000 | A6001 | A6002 | A6003 | A6004 | A6009  | A601   | A609  | A630  | A638  |
| A64   | A65   | A660  | A661  | A662  | A663  | A664  | A665   | A666   | A667  | A668  | A669  |
| A670  | A671  | A672  | A673  | A679  | A680  | A681  | A689   | A690   | A691  | A6920 | A6921 |
| A6922 | A6923 | A6929 | A698  | A699  | A70   | A710  | A711   | A719   | A740  | A7481 | A7489 |
| A749  | A750  | A751  | A752  | A753  | A759  | A770  | A771   | A772   | A773  | A7740 | A7741 |
| A7749 | A778  | A779  | A78   | A790  | A791  | A7981 | A7989  | A799   | A800  | A801  | A802  |
| A8030 | A8039 | A804  | A809  | A8100 | A8101 | A8109 | A811   | A812   | A8181 | A8182 | A8183 |
| A8189 | A819  | A820  | A821  | A829  | A830  | A831  | A832   | A833   | A834  | A835  | A836  |
| A838  | A839  | A840  | A841  | A848  | A8481 | A8489 | A849   | A850   | A851  | A852  | A858  |
| A86   | A870  | A871  | A872  | A878  | A879  | A880  | A881   | A888   | A89   | A90   | A91   |
| A920  | A921  | A922  | A9230 | A9231 | A9232 | A9239 | A924   | A925   | A928  | A929  | A930  |
| A931  | A932  | A938  | A94   | A950  | A951  | A959  | A960   | A961   | A962  | A968  | A969  |
| A980  | A981  | A982  | A983  | A984  | A985  | A988  | A99    | B000   | B001  | B002  | B003  |
| B004  | B0050 | B0051 | B0052 | B0053 | B0059 | B007  | B0081  | B0082  | B0089 | B009  | B010  |
| B0111 | B0112 | B012  | B0181 | B0189 | B019  | B020  | B021   | B0221  | B0222 | B0223 | B0224 |
| B0229 | B0230 | B0231 | B0232 | B0233 | B0234 | B0239 | B027   | B028   | B029  | B03   | B04   |
| B050  | B051  | B052  | B053  | B054  | B0581 | B0589 | B059   | B0600  | B0601 | B0602 | B0609 |
| B0681 | B0682 | B0689 | B069  | B070  | B078  | B079  | B08010 | B08011 | B0802 | B0803 | B0804 |
| B0809 | B081  | B0820 | B0821 | B0822 | B083  | B084  | B085   | B0860  | B0861 | B0862 | B0869 |
| B0870 | B0871 | B0872 | B0879 | B088  | B09   | B1001 | B1009  | B1081  | B1082 | B1089 | B150  |
| B159  | B160  | B161  | B162  | B169  | B170  | B1710 | B1711  | B172   | B178  | B179  | B180  |
| B181  | B182  | B188  | B189  | B190  | B1910 | B1911 | B1920  | B1921  | B199  | B20   | B250  |
| B251  | B252  | B258  | B259  | B260  | B261  | B262  | B263   | B2681  | B2682 | B2683 | B2684 |
| B2685 | B2689 | B269  | B2700 | B2701 | B2702 | B2709 | B2710  | B2711  | B2712 | B2719 | B2780 |

|        |        |        |        |        |        |        |        |        |        |        |        |
|--------|--------|--------|--------|--------|--------|--------|--------|--------|--------|--------|--------|
| B2781  | B2782  | B2789  | B2790  | B2791  | B2792  | B2799  | B300   | B301   | B302   | B303   | B308   |
| B309   | B330   | B331   | B3320  | B3321  | B3322  | B3323  | B3324  | B333   | B334   | B338   | B340   |
| B341   | B342   | B343   | B344   | B348   | B349   | B350   | B351   | B352   | B353   | B354   | B355   |
| B356   | B358   | B359   | B360   | B361   | B362   | B363   | B368   | B369   | B370   | B371   | B372   |
| B373   | B3741  | B3742  | B3749  | B375   | B376   | B377   | B3781  | B3782  | B3783  | B3784  | B3789  |
| B379   | B380   | B381   | B382   | B383   | B384   | B387   | B3881  | B3889  | B389   | B390   | B391   |
| B392   | B393   | B394   | B395   | B399   | B400   | B401   | B402   | B403   | B407   | B4081  | B4089  |
| B409   | B410   | B417   | B418   | B419   | B420   | B421   | B427   | B4281  | B4282  | B4289  | B429   |
| B430   | B431   | B432   | B438   | B439   | B440   | B441   | B442   | B447   | B4481  | B4489  | B449   |
| B450   | B451   | B452   | B453   | B457   | B458   | B459   | B460   | B461   | B462   | B463   | B464   |
| B465   | B468   | B469   | B470   | B471   | B479   | B480   | B481   | B482   | B483   | B484   | B488   |
| B49    | B500   | B508   | B509   | B510   | B518   | B519   | B520   | B528   | B529   | B530   | B531   |
| B538   | B54    | B550   | B551   | B552   | B559   | B560   | B561   | B569   | B570   | B571   | B572   |
| B5730  | B5731  | B5732  | B5739  | B5740  | B5741  | B5742  | B5749  | B575   | B5800  | B5801  | B5809  |
| B581   | B582   | B583   | B5881  | B5882  | B5883  | B5889  | B589   | B59    | B600   | B6000  | B6001  |
| B6002  | B6003  | B6009  | B6010  | B6011  | B6012  | B6013  | B6019  | B602   | B608   | B64    | B650   |
| B651   | B652   | B653   | B658   | B659   | B660   | B661   | B662   | B663   | B664   | B665   | B668   |
| B669   | B670   | B671   | B672   | B6731  | B6732  | B6739  | B674   | B675   | B6761  | B6769  | B677   |
| B678   | B6790  | B6799  | B680   | B681   | B689   | B690   | B691   | B6981  | B6989  | B699   | B700   |
| B701   | B710   | B711   | B718   | B719   | B72    | B7300  | B7301  | B7302  | B7309  | B731   | B740   |
| B741   | B742   | B743   | B744   | B748   | B749   | B75    | B760   | B761   | B768   | B769   | B770   |
| B7781  | B7789  | B779   | B780   | B781   | B787   | B789   | B79    | B80    | B810   | B811   | B812   |
| B813   | B814   | B818   | B820   | B829   | B830   | B831   | B832   | B833   | B834   | B838   | B839   |
| B850   | B851   | B852   | B853   | B854   | B86    | B870   | B871   | B872   | B873   | B874   | B8781  |
| B8782  | B8789  | B879   | B880   | B881   | B882   | B883   | B888   | B889   | B89    | B900   | B901   |
| B902   | B908   | B909   | B91    | B92    | B940   | B941   | B942   | B948   | B949   | B950   | B951   |
| B952   | B953   | B954   | B955   | B9561  | B9562  | B957   | B958   | B960   | B961   | B9620  | B9621  |
| B9622  | B9623  | B9629  | B963   | B964   | B965   | B966   | B967   | B9681  | B9682  | B9689  | B970   |
| B9710  | B9711  | B9712  | B9719  | B9721  | B9729  | B9730  | B9731  | B9732  | B9733  | B9734  | B9735  |
| B9739  | B974   | B975   | B976   | B977   | B9781  | B9789  | B998   | B999   | R6521  | R7881  | I76    |
| R6520  | I00    | I029   | K9081  | G000   | G001   | G002   | G003   | G008   | G009   | G01    | G02    |
| G042   | I301   | I330   | I400   | J1082  | J120   | J121   | J122   | J123   | J1281  | J1289  | J129   |
| J13    | J14    | J150   | J151   | J1520  | J15211 | J15212 | J1529  | J153   | J154   | J155   | J156   |
| J157   | J158   | J159   | J160   | J168   | J17    | J180   | J181   | J188   | J189   | J851   | J852   |
| J09X1  | J09X2  | J09X3  | J09X9  | J1000  | J1001  | J1008  | J101   | J102   | J1089  | J1100  | J1108  |
| J111   | J112   | J1181  | J1182  | J1183  | J1189  | J36    | J200   | J201   | J202   | J203   | J204   |
| J205   | J206   | J207   | J208   | J210   | J211   | J218   | J219   | A360   | A361   | A362   | J00    |
| J020   | J028   | J0300  | J0301  | J069   | J440   | J470   | J340   | J390   | J391   | K610   | K611   |
| K612   | K613   | K614   | K630   | K650   | K651   | K652   | N10    | N151   | N3000  | N3001  | N340   |
| N764   | L0100  | L0101  | L0102  | L0103  | L0109  | L011   | L0201  | L0202  | L0203  | L0211  | L0212  |
| L0213  | L02211 | L02212 | L02213 | L02214 | L02215 | L02216 | L02219 | L02221 | L02222 | L02223 | L02224 |
| L02225 | L02226 | L02229 | L02231 | L02232 | L02233 | L02234 | L02235 | L02236 | L02239 | L0231  | L0232  |
| L0233  | L02411 | L02412 | L02413 | L02414 | L02415 | L02416 | L02419 | L02421 | L02422 | L02423 | L02424 |
| L02425 | L02426 | L02429 | L02431 | L02432 | L02433 | L02434 | L02435 | L02436 | L02439 | L02511 | L02512 |

|         |        |         |        |         |        |         |        |         |        |         |        |
|---------|--------|---------|--------|---------|--------|---------|--------|---------|--------|---------|--------|
| L02519  | L02521 | L02522  | L02529 | L02531  | L02532 | L02539  | L02611 | L02612  | L02619 | L02621  | L02622 |
| L02629  | L02631 | L02632  | L02639 | L02811  | L02818 | L02821  | L02828 | L02831  | L02838 | L0291   | L0292  |
| L0293   | L03011 | L03012  | L03019 | L03021  | L03022 | L03029  | L03031 | L03032  | L03039 | L03041  | L03042 |
| L03049  | L03111 | L03112  | L03113 | L03114  | L03115 | L03116  | L03119 | L03121  | L03122 | L03123  | L03124 |
| L03125  | L03126 | L03129  | L03211 | L03212  | L03213 | L03221  | L03222 | L03311  | L03312 | L03313  | L03314 |
| L03315  | L03316 | L03317  | L03319 | L03321  | L03322 | L03323  | L03324 | L03325  | L03326 | L03327  | L03329 |
| L03811  | L03818 | L03891  | L03898 | L0390   | L0391  | L0889   | L089   | M0000   | M00011 |         |        |
| M00012  |        | M00019  |        | M00021  |        | M00022  |        | M00029  |        | M00031  |        |
| M00032  |        | M00039  |        | M00041  |        | M00042  |        | M00049  |        | M00051  |        |
| M00052  |        | M00059  |        | M00061  |        | M00062  |        | M00069  |        | M00071  |        |
| M00072  |        | M00079  |        | M0008   | M0009  | M0010   | M00111 |         | M00112 |         |        |
| M00119  |        | M00121  |        | M00122  |        | M00129  |        | M00131  |        | M00132  |        |
| M00139  |        | M00141  |        | M00142  |        | M00149  |        | M00151  |        | M00152  |        |
| M00159  |        | M00161  |        | M00162  |        | M00169  |        | M00171  |        | M00172  |        |
| M00179  |        | M0018   | M0019  | M0020   | M00211 |         | M00212 |         | M00219 |         |        |
| M00221  |        | M00222  |        | M00229  |        | M00231  |        | M00232  |        | M00239  |        |
| M00241  |        | M00242  |        | M00249  |        | M00251  |        | M00252  |        | M00259  |        |
| M00261  |        | M00262  |        | M00269  |        | M00271  |        | M00272  |        | M00279  |        |
| M0028   | M0029  | M0080   | M00811 |         | M00812 |         | M00819 |         | M00821 |         |        |
| M00822  |        | M00829  |        | M00831  |        | M00832  |        | M00839  |        | M00841  |        |
| M00842  |        | M00849  |        | M00851  |        | M00852  |        | M00859  |        | M00861  |        |
| M00862  |        | M00869  |        | M00871  |        | M00872  |        | M00879  |        | M0088   | M0089  |
| M009    | M01X0  | M01X11  |        | M01X12  |        | M01X19  |        | M01X21  |        | M01X22  |        |
| M01X29  |        | M01X31  |        | M01X32  |        | M01X39  |        | M01X41  |        | M01X42  |        |
| M01X49  |        | M01X51  |        | M01X52  |        | M01X59  |        | M01X61  |        | M01X62  |        |
| M01X69  |        | M01X71  |        | M01X72  |        | M01X79  |        | M01X8   | M01X9  | M4620   | M4621  |
| M4622   | M4623  | M4624   | M4625  | M4626   | M4627  | M4628   | M8600  | M86011  |        | M86012  |        |
| M86019  |        | M86021  |        | M86022  |        | M86029  |        | M86031  |        | M86032  |        |
| M86039  |        | M86041  |        | M86042  |        | M86049  |        | M86051  |        | M86052  |        |
| M86059  |        | M86061  |        | M86062  |        | M86069  |        | M86071  |        | M86072  |        |
| M86079  |        | M8608   | M8609  | M8610   | M86111 |         | M86112 |         | M86119 |         |        |
| M86121  |        | M86122  |        | M86129  |        | M86131  |        | M86132  |        | M86139  |        |
| M86141  |        | M86142  |        | M86149  |        | M86151  |        | M86152  |        | M86159  |        |
| M86161  |        | M86162  |        | M86169  |        | M86171  |        | M86172  |        | M86179  |        |
| M8618   | M8619  | T80211A |        | T80211D |        | T80211S |        | T80212A |        | T80212D |        |
| T80212S |        | T80218A |        | T80218D |        | T80218S |        | T80219A |        | T80219D |        |
| T80219S |        | T8022XA |        | T8022XD |        | T8022XS |        | T8029XA |        | T8029XD |        |
| T8029XS |        | T8140XA |        | T8140XD |        | T8140XS |        | T8144XA |        | T8144XD |        |
| T8144XS |        |         |        |         |        |         |        |         |        |         |        |

Acute chest syndrome: D57211 D5701 D57411 D57811

Major bleeding: H0523\* H210\* H313\* H3131\* H3141\* H356\* H3573\* H431\* H4481\* H4702\* H6112\*  
I60\* S066X\* I61\* S0634\* S0635\* S0636\* S0637\* S0638\* I620\* I621 I629 R58 I8501 K2211 K250 K252

K254 K256 K260 K262 K264 K266 K270 K272 K274 K276 K280 K282 K284 K286 K2901 K2921 K2931  
 K2941 K2951 K2961 K2971 K2981 K2991 K31811 K920 K50011 K50111 K50811 K50911 K51011 K51211  
 K51311 K51411 K51511 K51811 K51911 K5521 K5701 K5711 K5713 K5721 K5731 K5733 K5741 K5751  
 K5753 K5781 K5791 K5793 K625 K921 K922 M250\* M7981 N837 N897 N920 N921 N925 N930 N938  
 N939 O717 R040 R041 R042 R0489 R049 R310 R319 S065X\* K661 S064X0A S064X0D I7774 I713 J942  
 D62 I60 I61 I62 R31 R04 D500 H313 H356 H431 H450 I312 I850 K250 K252 K254 K256 K260 K262 K264  
 K266 K270 K272 K274 K276 K280 K282 K284 K286 K625 K661 K920 K921 K922 S064 S065 S066 J942  
 K228F K298A K638B K638C K838F K868G I864A H052A S368D G951A D62 D683 D698 D699  
 H113 H210 H313 H356 H431 H450 H922 I230 I312 I600 I601 I602  
 I603 I604 I605 I606 I607 I608 I609 I610 I611 I612 I613 I614  
 I615 I616 I618 I619 I620 I621 I629 I850 I983 J942 K226 K250  
 K252 K254 K256 K260 K262 K264 K266 K270 K272 K274 K276 K280  
 K282 K284 K286 K290 K625 K661 K762 K920 K921 K922 M250 N020  
 N021 N022 N023 N024 N025 N026 N027 N028 N029 N421 N920 N921  
 N923 N924 N930 N938 N939 N950 R040 R041 R042 R048 R049 R31  
 R58 S064 S065 S066 S260 S271 T792

Cerebrovascular accident: G43601 G43609 G43611 G43619 I6000 I6001 I6002 I6010 I6011  
 I6012 I602 I6020 I6021 I6022 I6030 I6031 I6032 I604 I6050 I6051 I6052  
 I606 I607 I608 I609 I610 I611 I612 I613 I614 I615 I616 I618  
 I619 I6200 I6201 I6202 I6203 I621 I629 I6300 I63011 I63012 I63013 I63019  
 I6302 I63031 I63032 I63033 I63039 I6309 I6310 I63111 I63112 I63113 I63119 I6312  
 I63131 I63132 I63133 I63139 I6319 I6320 I63211 I63212 I63213 I63219 I6322 I63231  
 I63232 I63233 I63239 I6329 I6330 I63311 I63312 I63313 I63319 I63321 I63322 I63323  
 I63329 I63331 I63332 I63333 I63339 I63341 I63342 I63343 I63349 I6339 I6340 I63411  
 I63412 I63413 I63419 I63421 I63422 I63423 I63429 I63431 I63432 I63433 I63439 I63441  
 I63442 I63443 I63449 I6349 I6350 I63511 I63512 I63513 I63519 I63521 I63522 I63523  
 I63529 I63531 I63532 I63533 I63539 I63541 I63542 I63543 I63549 I6359 I636 I638  
 I639 I6601 I6602 I6603 I6609 I6611 I6612 I6613 I6619 I6621 I6622 I6623  
 I6629 I663 I668 I669 R29700 R29701 R29702 R29703 R29704 R29705 R29706 R29707  
 R29708 R29709 R29710 R29711 R29712 R29713 R29714 R29715 R29716 R29717 R29718 R29719  
 R29720 R29721 R29722 R29723 R29724 R29725 R29726 R29727 R29728 R29729 R29730 R29731  
 R29732 R29733 R29734 R29735 R29736 R29737 R29738 R29739 R29740 R29741 R29742 I6501  
 I6502 I6503 I6509 I651 I6521 I6522 I6523 I6529 I658 I659 G460 G461  
 G462 G463 G464 G465 G466 G467 G468 I671 I672 I675 I676 I677  
 I6781 I6782 I6783 I67841 I67848 I6789 I679 I680 I682 I688 B0681 G450  
 G451 G452 G453 G454 G458 G459 I6900 I6901 I69010 I69011 I69012 I69013  
 I69014 I69015 I69018 I69019 I69020 I69021 I69022 I69023 I69028 I69031 I69032 I69033  
 I69034 I69039 I69041 I69042 I69043 I69044 I69049 I69051 I69052 I69053 I69054 I69059  
 I69061 I69062 I69063 I69064 I69065 I69069 I69090 I69091 I69092 I69093 I69098 I6910  
 I6911 I69110 I69111 I69112 I69113 I69114 I69115 I69118 I69119 I69120 I69121 I69122  
 I69123 I69128 I69131 I69132 I69133 I69134 I69139 I69141 I69142 I69143 I69144 I69149  
 I69151 I69152 I69153 I69154 I69159 I69161 I69162 I69163 I69164 I69165 I69169 I69190  
 I69191 I69192 I69193 I69198 I6920 I6921 I69210 I69211 I69212 I69213 I69214 I69215  
 I69218 I69219 I69220 I69221 I69222 I69223 I69228 I69231 I69232 I69233 I69234 I69239



I69241 I69242 I69243 I69244 I69249 I69251 I69252 I69253 I69254 I69259 I69261 I69262  
I69263 I69264 I69265 I69269 I69290 I69291 I69292 I69293 I69298 I6930 I6931 I69310  
I69311 I69312 I69313 I69314 I69315 I69318 I69319 I69320 I69321 I69322 I69323 I69328  
I69331 I69332 I69333 I69334 I69339 I69341 I69342 I69343 I69344 I69349 I69351 I69352  
I69353 I69354 I69359 I69361 I69362 I69363 I69364 I69365 I69369 I69390 I69391 I69392  
I69393 I69398 I6980 I6981 I69810 I69811 I69812 I69813 I69814 I69815 I69818 I69819  
I69820 I69821 I69822 I69823 I69828 I69831 I69832 I69833 I69834 I69839 I69841 I69842  
I69843 I69844 I69849 I69851 I69852 I69853 I69854 I69859 I69861 I69862 I69863 I69864  
I69865 I69869 I69890 I69891 I69892 I69893 I69898 I6990 I6991 I69910 I69911 I69912  
I69913 I69914 I69915 I69918 I69919 I69920 I69921 I69922 I69923 I69928 I69931 I69932  
I69933 I69934 I69939 I69941 I69942 I69943 I69944 I69949 I69951 I69952 I69953 I69954  
I69959 I69961 I69962 I69963 I69964 I69965 I69969 I69990 I69991 I69992 I69993 I69998

Venous thromboembolism: I81 I820 I82210 I82211 I82220 I82221 I82290 I82291 I823  
I82401 I82402 I82403 I82409 I82411 I82412 I82413 I82419 I82421 I82422 I82423 I82429 I82431  
I82432 I82433 I82439 I82441 I82442 I82443 I82449 I82491 I82492 I82493 I82499 I824Y1  
I824Y2 I824Y3 I824Y9 I824Z1 I824Z2 I824Z3 I824Z9 I82501 I82502 I82503 I82509 I82511  
I82512 I82513 I82519 I82521 I82522 I82523 I82529 I82531 I82532 I82533 I82539 I82541  
I82542 I82543 I82549 I82591 I82592 I82593 I82599 I825Y1 I825Y2 I825Y3 I825Y9 I825Z1  
I825Z2 I825Z3 I825Z9 I82621 I82622 I82623 I82629 I82721 I82722 I82723 I82729 I82A11  
I82A12 I82A13 I82A19 I82A21 I82A22 I82A23 I82A29 I82B11 I82B12 I82B13 I82B19 I82B21  
I82B22 I82B23 I82B29 I82C11 I82C12 I82C13 I82C19 I82C21 I82C22 I82C23 I82C29 I2602  
I2609 I2692 I2699 I2782 Z86711

Acute respiratory failure: J80 J95821 J95822 J9600 J9601 J9602 J9620 J9621 J9622 R092

Acute kidney injury: N170 N171 N172 N178 N179

Procedure codes {International Classification of Diseases, Tenth Revision Procedure Coding System (ICD-10-PCS)}:

Red Blood Cell Transfusion: 30230N1 30230P1 30233N1 30233P1 30240N1 30240P1 30243N1 30243P1
